# Supplementary material
Source: MDPI journal article supplement (https://www.mdpi.com/2571-6255/2/2/31)
Supplement: s1 [file s1]

## Sheet: Sheet1
Id	depth	mean age	rBC	rBC influx
	(cm)	YBP	mg rBC g-1 of sediment	mg cm-2 yr-1
LC_0	0	-66.3	1377.09	100.77
LC_0.5	0.5	-64.3	1986.97	144.245
LC_1	1	-62.2	714.353	60.5017
LC_1.5	1.5	-60.4	707.476	63.444
LC_2	2	-58.7	1976.29	150.643
LC_2.5	2.5	-56.7	631.681	51.3557
LC_3	3	-54.7	808.072	57.1272
LC_3.5	3.5	-52.4	1251.33	88.4636
LC_4	4	-50.1	967.854	58.2863
LC_4.5	4.5	-47.4	571.291	35.7277
LC_5	5	-44.8	830.36	45.0055
LC_5.5	5.5	-41.8	1563.41	87.6588
LC_6.0	6	-38.9	1399.54	71.1141
LC_6.5	6.5	-35.7	842.504	42.9809
LC_7.0	7	-32.5	1002.13	46.7422
LC_7.5	7.5	-29	988.467	47.461
LC_8.0	8	-25.6	922.721	44.3042
LC_8.5	8.5	-22.2	1144.79	53.3963
LC_9.0	9	-18.7	1175.12	56.423
LC_9.5	9.5	-15.3	681.589	32.7263
LC_10.0	10	-11.9	1962.43	84.307
LC_10.5	10.5	-8.1	1284.65	53.4557
LC_11.0	11	-4.5	1583.28	56.4703
LC_11.5	11.5	-0.3	1113.05	38.7756
LC_12.0	12	4	920.102	27.0257
LC_12.5	12.5	9.1	1070.63	32.0761
LC_13.0	13	14.1	1046.22	24.4881
LC_13.5	13.5	20.5	694.96	16.2664
LC_14.0	14	26.9	670.664	12.2519
LC_14.5	14.5	35.1	542.255	10.8688
LC_15.0	15	43.1	1079.67	14.0753
LC_15.5	15.5	55.4	646.556	8.71221
LC_16.0	16	67.3	806.484	9.72329
LC_16.5	16.5	80.6	448.313	5.40504
LC_17.0	17	93.9	342.845	3.59315
LC_17.5	17.5	109.2	315.902	3.28928
LC_18.0	18	124.6	310.568	3.27629
LC_18.5	18.5	139.8	411.479	4.36894
LC_19.0	19	155.1	890.685	9.39557
LC_19.5	19.5	170.5	657.847	6.93943
LC_20	20	185.9	2296.94	24.8759
LC_20.5	20.5	200.9	2180.95	23.4633
LC_21	21	216	2735	29.4239
LC_21.5	21.5	231.1	2924.2	31.2524
LC_22	22	246.3	3384.22	36.1689
LC_22.5	22.5	261.5	3048.7	32.2604
LC_23	23	276.8	2820.18	30.2376
LC_23.5	23.5	291.9	3577.28	38.3551
LC_24	24	307	3355.78	35.9802
LC_24.5	24.5	322.1	1869.7	19.9148
LC_25	25	337.3	5018.52	53.1045
LC_25.5	25.5	352.6	3989.11	43.0558
LC_26	26	367.6	4895.46	53.193
LC_26.5	26.5	382.5	4217.61	53.3701
LC_27	27	397.1	4566.18	56.2402
LC_27.5	27.5	412.1	5008.84	61.6922
LC_28	28	427.1	4374.88	52.8274
LC_28.5	28.5	442.4	2127.64	26.0319
LC_29	29	457.5	3498.8	43.0936
LC_29.5	29.5	472.5	5002.25	60.403
LC_30	30	487.8	4077.11	63.2981
LC_30.5	30.5	499.7	5543.16	91.7882
LC_31	31	511.6	6443.85	107.607
LC_31.5	31.5	523.4	4282.16	72.1196
LC_32	32	535.1	3698.27	61.758
LC_32.5	32.5	546.9	5538.69	91.7142
LC_33	33	558.8	5431.77	92.2699
LC_33.5	33.5	570.4	3014.43	51.2064
LC_34	34	582	4384.07	74.4726
LC_34.5	34.5	593.6	3088.57	62.6174
LC_35	35	605.1	2979.24	58.8651
LC_35.5	35.5	616.9	6290.31	124.287
LC_36	36	628.7	5489.31	114.271
LC_36.5	36.5	639.9	5491.57	114.318
LC_37	37	651.1	3999.68	81.0893
LC_37.5	37.5	662.6	3001.9	60.8604
LC_38	38	674.1	1988.25	40.3096
LC_38.5	38.5	685.6	2204.7	51.7814
LC_39	39	697	3003.18	67.0083
LC_39.5	39.5	709	4816.09	107.459
LC_40	40	721	2408.78	54.6569
LC_40.5	40.5	732.8	3361.23	76.2686
LC_41	41	744.6	1641.31	36.6217
LC_41.5	41.5	756.6	3437.54	77.3447
LC_42	42	768.5	3687.95	84.3973
LC_42.5	42.5	780.2	3372.24	66.1947
LC_43	43	791.8	6317.27	122.944
LC_43.5	43.5	803.5	4235.46	83.1392
LC_44	44	815.1	5915.13	118.147
LC_44.5	44.5	826.5	4271.77	84.581
LC_45	45	838	5921.35	114.262
LC_45.5	45.5	849.8	4831.35	92.4452
LC_46	46	861.7	3787.53	73.0865
LC_46.5	46.5	873.5	2880.8	59.9182
LC_47	47	885.2	5166.51	108.385
LC_47.5	47.5	896.8	4842.9	102.48
LC_48	48	908.3	4569.5	95.861
LC_48.5	48.5	919.9	4359.83	89.9123
LC_49	49	931.7	3948.37	82.1227
LC_49.5	49.5	943.4	3762.8	78.9376
LC_50	50	955	4609.31	95.8697
LC_50.5	50.5	966.7	4544.74	95.9639
LC_51	51	978.4	4323.78	90.5246
LC_51.5	51.5	990.2	3388.12	69.7529
LC_52	52	1002.2	4530.81	94.0619
LC_52.5	52.5	1014.1	3657.47	76.5745
LC_53	53	1025.9	3670.8	79.5501
LC_53.5	53.5	1037.3	5572.25	119.706
LC_55	55	1072.3	4705.79	98.5602
LC_55.5	55.5	1084	4372.24	90.7981
LC_56	56	1095.8	4108.09	86.7834
LC_56.5	56.5	1107.4	5478.57	115.735
LC_57	57	1119	2351.97	50.1174
LC_57.5	57.5	1130.5	4651.15	98.2556
LC_65	65	1229	1343.77	7.74459
LC_65.5	65.5	1259	1452.6	7.96267
LC_66	66	1288.3	1430.82	7.84328
LC_66.5	66.5	1318.2	2001.46	10.9713
LC_67	67	1347.9	2596.55	14.2334
LC_67.5	67.5	1378.5	3842.8	21.065
LC_68	68	1408.9	6392.53	35.0417
LC_68.5	68.5	1438.4	5279.17	28.9386
LC_69	69	1467.9	4943.28	27.0974
LC_69.5	69.5	1498.1	4857.51	26.6273
LC_70_74.5	70	1527.9	1830.9	14.8333
LC_75	75	1828	1338.47	11.0357
LC_75.5	75.5	1857.6	3379.69	27.3811
LC_76_80.5	76	2021.5	1856.5	15.3069
LC_81	81	2187.1	4049.51	33.3882
LC_81.5	81.5	2217.8	5148.72	42.4512
LC_82	82	2248.7	4031.39	33.2389
LC_82.5	82.5	2277.5	3665.59	30.2228
LC_83	83	2306.6	4993.4	44.5578
LC_83.5	83.5	2337.2	1840.53	16.4237
LC_84	84	2367.5	4009.52	35.7783
LC_84.5	84.5	2397.3	3907.49	34.8678
LC_85	85	2426.3	4327.3	38.6139
LC_85.5	85.5	2455.6	2445.43	21.8214
LC_86	86	2484.2	3443.11	30.724
LC_86.5	86.5	2513	2194.26	19.5802
LC_87	87	2541.7	2664.8	27.3364
LC_87.5	87.5	2570.8	4918.54	50.456
LC_88	88	2599.6	4912.38	50.3928
LC_88.5	88.5	2629.3	5138.85	52.716
LC_89	89	2659	4492.71	46.0877
LC_89.5	89.5	2688.1	2436.37	24.9931
LC_90	90	2717	4917.77	37.8832
LC_90.5	90.5	2746.2	8411.95	64.8001
LC_91	91	2775.6	6754.64	52.0332
LC_91.5	91.5	2804.3	5614.55	43.2508
LC_92	92	2833.2	3928.74	30.2644
LC_92.5	92.5	2862.7	7592.66	58.4888
LC_93	93	2892.3	6306.9	48.5841
LC_94	94	2949.9	4282.02	32.9858
LC_94.5	94.5	2978.2	5927.73	45.6633
LC_95	95	3006.1	8879.03	57.2549
LC_95.5	95.5	3035.7	6138.08	39.5804
LC_96	96	3065.4	6814.22	43.9404
LC_96.5	96.5	3095	5979.4	38.5572
LC_97	97	3124.7	6744.3	43.4895
LC_97.5	97.5	3153.5	6864.64	44.2655
LC_98	98	3182.3	7158.26	46.1588
LC_98.5	98.5	3211.7	5785.58	37.3073
LC_99	99	3241.2	5449.85	35.1424
LC_99.5	99.5	3271.1	3809.64	24.5658
LC_100	100	3301	7955.74	51.3013
LC_100.5	100.5	3330.5	6371.12	41.0831
LC_101	101	3360	5122.73	33.033
LC_101.5	101.5	3388.1	4282.74	27.6165
LC_102	102	3416	5543.95	35.7492
LC_102.5	102.5	3445	5556.37	35.8293
